# Supplementary material
Source: PubMed Central journal article supplement (PMC4795184)
Supplement: NIHMS767379-supplement-1.pdf [file NIHMS767379-supplement-1.pdf]

**Table S1. Subsequent programming changes during follow-up.**

| <b>Programming at Implant (10 days from implant)</b> | <b>N (% of total)</b> | <b>N (pct) patients with any programming change during follow-up</b> | <b>Settings Adjusted</b> | <b>Any change</b> | <b>Most recent change before 6-month period</b> | <b>Most recent change</b> | <b>Most time spent in</b> |
|------------------------------------------------------|-----------------------|----------------------------------------------------------------------|--------------------------|-------------------|-------------------------------------------------|---------------------------|---------------------------|
| <b>Nominal</b>                                       | 34.3%                 | 33.2%                                                                | AV                       | 86.8%             | 45.2%                                           | 77.7%                     | 86.6%                     |
|                                                      |                       |                                                                      | VV                       | 11.2%             | 4.8%                                            | 8.8%                      | 9.3%                      |
|                                                      |                       |                                                                      | AV & VV                  | 7.5%              | 1.5%                                            | 6.2%                      | 4.1%                      |
|                                                      |                       |                                                                      | Dyn. Delay               | 42.2%             | 18.6%                                           | 35.2%                     |                           |
| <b>AV Adjusted</b>                                   | 40.2%                 | 39.0%                                                                | AV                       | 92.5%             | 48.9%                                           | 83.4%                     | 88.6%                     |
|                                                      |                       |                                                                      | VV                       | 8.9%              | 4.0%                                            | 6.8%                      | 6.8%                      |
|                                                      |                       |                                                                      | AV & VV                  | 7.0%              | 1.5%                                            | 5.0%                      | 4.6%                      |
|                                                      |                       |                                                                      | Dyn. Delay               | 26.0%             | 9.5%                                            | 19.0%                     |                           |
| <b>VV Adjusted</b>                                   | 10.6%                 | 36.4%                                                                | AV                       | 83.6%             | 43.6%                                           | 75.5%                     | 83.6%                     |
|                                                      |                       |                                                                      | VV                       | 14.1%             | 5.9%                                            | 10.5%                     | 11.7%                     |
|                                                      |                       |                                                                      | AV & VV                  | 5.0%              | 1.4%                                            | 4.1%                      | 4.7%                      |
|                                                      |                       |                                                                      | Dyn. Delay               | 50.0%             | 25.5%                                           | 42.7%                     |                           |
| <b>AV and VV Adjusted</b>                            | 14.9%                 | 37.0%                                                                | AV                       | 85.7%             | 45.7%                                           | 73.0%                     | 78.1%                     |
|                                                      |                       |                                                                      | VV                       | 15.6%             | 5.1%                                            | 11.7%                     | 11.9%                     |
|                                                      |                       |                                                                      | AV & VV                  | 16.5%             | 4.4%                                            | 11.4%                     | 10.0%                     |
|                                                      |                       |                                                                      | Dyn. Delay               | 34.3%             | 14.3%                                           | 27.0%                     |                           |
| <b>Total</b>                                         | 5709                  | 36.4%                                                                | AV                       | 88.8%             | 46.7%                                           | 79.2%                     | 85.8%                     |
|                                                      |                       |                                                                      | VV                       | 11.2%             | 4.6%                                            | 8.6%                      | 8.9%                      |
|                                                      |                       |                                                                      | AV & VV                  | 8.4%              | 1.9%                                            | 6.3%                      | 5.3%                      |
|                                                      |                       |                                                                      | Dyn. Delay               | 34.9%             | 14.8%                                           | 27.8%                     |                           |

AV: atrioventricular timing; VV: ventricular-to-ventricular timing.
