# Supplementary material
Source: PubMed Central journal article supplement (PMC4795184)
Supplement: NIHMS767379-supplement-2.pdf [file NIHMS767379-supplement-2.pdf]

**Table S2. Baseline characteristics, stratified by programming at implant using paced AV delay.**

|                                    | <b>Nominal<br/>(n=1596)</b> | <b>AV Adjusted<br/>(n=2666)</b> | <b>P-value<br/>(vs.<br/>Nominal)</b> | <b>VV Adjusted<br/>(n=583)</b> | <b>P-value<br/>(vs.<br/>Nominal)</b> | <b>AV and VV<br/>adjusted<br/>(n=873)</b> | <b>P-value<br/>(vs.<br/>Nominal)</b> |
|------------------------------------|-----------------------------|---------------------------------|--------------------------------------|--------------------------------|--------------------------------------|-------------------------------------------|--------------------------------------|
| Age                                | 70.35±10.91                 | 68.59±11.28                     | <.0001                               | 69.87±11.49                    | 0.3805                               | 68.70±11.67                               | 0.0005                               |
| Male                               | 75.3%                       | 69.5%                           | <.0001                               | 73.8%                          | 0.4489                               | 71.1%                                     | 0.0228                               |
| DFT at implant                     | 76.4%                       | 83.6%                           | <.0001                               | 80.6%                          | 0.0386                               | 81.7%                                     | 0.0026                               |
| Last shock energy (J)              | 20056.0±<br>6537.20         | 19373.5±<br>6184.69             | 0.0069                               | 20059.8±<br>6066.08            | 0.8777                               | 19393.3±<br>5408.73                       | 0.0257                               |
| <u>Bradycardia Programming</u>     |                             |                                 |                                      |                                |                                      |                                           |                                      |
| DDD                                | 50.4%                       | 60.1%                           | <.0001                               | 48.4%                          | 0.4072                               | 58.6%                                     | <.0001                               |
| DDDR                               | 49.6%                       | 39.9%                           | <.0001                               | 51.6%                          | 0.4072                               | 41.4%                                     | <.0001                               |
| LRL                                | 61.80±7.48                  | 59.95±7.34                      | <.0001                               | 59.95±9.27                     | <.0001                               | 58.93±9.00                                | <.0001                               |
| <u>Tachyarrhythmia Programming</u> |                             |                                 |                                      |                                |                                      |                                           |                                      |
| 1 therapy zone                     | 13.9%                       | 17.6%                           | 0.0013                               | 9.1%                           | 0.0030                               | 11.2%                                     | 0.0626                               |
| 2 therapy zones                    | 71.6%                       | 69.9%                           | 0.2409                               | 75.8%                          | 0.0505                               | 75.4%                                     | 0.0437                               |
| 3 therapy zones                    | 14.5%                       | 12.5%                           | 0.0562                               | 15.1%                          | 0.7487                               | 13.4%                                     | 0.4357                               |
| VT detection rate                  | 175.25±15.17                | 175.87±13.89                    | 0.2043                               | 175.55±14.62                   | 0.6808                               | 174.82±13.76                              | 0.4902                               |
| VF detection rate                  | 207.45±16.18                | 207.18±16.04                    | 0.5996                               | 208.98±14.74                   | 0.0469                               | 207.31±16.02                              | 0.8383                               |
| ATP therapy 'on' in VT zone/s      | 94.6%                       | 94.8%                           | 0.8165                               | 95.8%                          | 0.2993                               | 96.2%                                     | 0.0907                               |

Numbers are % or mean ± standard deviation.

AV: atrioventricular timing; VV: ventricular-to-ventricular timing; DFT: defibrillation threshold testing; LRL: lower rate limit.
