# Supplementary material
Source: PubMed Central journal article supplement (PMC4795184)
Supplement: NIHMS767379-supplement-3.pdf [file NIHMS767379-supplement-3.pdf]

**Table S3. Baseline rhythm characteristics (within 6 months of implant), stratified by programming at implant, using paced AV delay.**

|                                       | <b>Nominal<br/>(n=1596)</b> | <b>AV Adjusted<br/>(n=2666)</b> | <b>P-value (vs.<br/>Nominal)</b> | <b>VV Adjusted<br/>(n=583)</b> | <b>P-value (vs.<br/>Nominal)</b> | <b>AV and VV<br/>adjusted<br/>(n=873)</b> | <b>P-value (vs.<br/>Nominal)</b> |
|---------------------------------------|-----------------------------|---------------------------------|----------------------------------|--------------------------------|----------------------------------|-------------------------------------------|----------------------------------|
| <b>Patient activity (%)</b>           | 6.61±4.01                   | 7.29±4.20                       | <.0001                           | 6.49±4.05                      | 0.5662                           | 6.87±3.98                                 | 0.1260                           |
| <b>HRV SDANN</b>                      | 69.32±19.83                 | 70.89±19.32                     | 0.1024                           | 71.37±20.96                    | 0.1698                           | 70.02±19.92                               | 0.5686                           |
| <b>HRV footprint</b>                  | 28.21±9.03                  | 28.26±8.74                      | 0.9083                           | 27.53±9.33                     | 0.3145                           | 28.28±9.27                                | 0.9010                           |
| <b>HRV mean HR</b>                    | 76.96±8.36                  | 77.28±8.17                      | 0.4354                           | 77.08±9.38                     | 0.8426                           | 76.83±8.77                                | 0.8034                           |
| <b>AF burden &gt; 5%</b>              | 23.1%                       | 12.3%                           | <.0001                           | 22.5%                          | 0.7493                           | 11.0%                                     | <.0001                           |
| <b>LV pacing &lt; 95%</b>             | 17.7%                       | 17.6%                           | 0.9324                           | 13.9%                          | 0.0335                           | 16.3%                                     | 0.3562                           |
| <b>Any shock during<br/>follow-up</b> | 6.5%                        | 6.5%                            | 0.9894                           | 7.0%                           | 0.6686                           | 7.8%                                      | 0.2349                           |
| <b>ATP therapy</b>                    | 13.3%                       | 15.9%                           | 0.0219                           | 15.1%                          | 0.2774                           | 18.9%                                     | 0.0002                           |

Numbers are % or mean ± standard deviation.

AV: atrioventricular timing; VV: ventricular-to-ventricular timing; ATP: anti-tachycardia pacing; AF: atrial fibrillation; LV: left-ventricular; HRV: heart rate variability; SDANN: standard deviation of the average NN intervals; HR heart rate.
