# Supplementary material
Source: PubMed Central journal article supplement (PMC4795184)
Supplement: NIHMS767379-supplement-4.pdf [file NIHMS767379-supplement-4.pdf]

**Table S4. Unadjusted outcomes at follow-up (using paced AV delay).**

|                               | <b>Nominal<br/>(n=1596)</b> | <b>AV Adjusted<br/>(n=2666)</b> | <b>P-value<br/>(vs.<br/>Nominal)</b> | <b>VV Adjusted<br/>(n=583)</b> | <b>P-value<br/>(vs.<br/>Nominal)</b> | <b>AV and VV<br/>adjusted<br/>(n=873)</b> | <b>P-value<br/>(vs.<br/>Nominal)</b> |
|-------------------------------|-----------------------------|---------------------------------|--------------------------------------|--------------------------------|--------------------------------------|-------------------------------------------|--------------------------------------|
| <b>Follow-up, days</b>        | 948.60±326.91               | 984.09±<br>323.14               | 0.0009                               | 938.98±341.18                  | 0.5576                               | 955.82±<br>331.95                         | 0.6133                               |
| <b>PCT activity</b>           | 6.79±4.14                   | 7.59±4.51                       | <.0001                               | 6.95±4.49                      | 0.5092                               | 7.27±4.10                                 | 0.0279                               |
| <b>Change from baseline</b>   | -0.06±1.34                  | 0.01±1.56                       | 0.2002                               | -0.05±1.60                     | 0.8760                               | -0.01±1.46                                | 0.4799                               |
| <b>HRV SDANN</b>              | 72.56±20.71                 | 73.40±19.16                     | 0.4978                               | 74.84±22.65                    | 0.2459                               | 72.55±21.71                               | 0.9932                               |
| <b>Change from baseline</b>   | 0.61±9.54                   | 0.98±10.21                      | 0.5543                               | 0.47±9.86                      | 0.8896                               | 0.58±10.14                                | 0.9700                               |
| <b>HRV footprint</b>          | 28.81±9.27                  | 28.90±8.84                      | 0.8631                               | 29.26±10.38                    | 0.6116                               | 28.83±9.71                                | 0.9751                               |
| <b>Change from baseline</b>   | 0.10±3.68                   | 0.21±3.89                       | 0.6623                               | 0.61±4.46                      | 0.2015                               | -0.11±4.71                                | 0.5107                               |
| <b>HRV mean HR</b>            | 77.35±8.22                  | 76.95±8.06                      | 0.4361                               | 76.16±10.25                    | 0.1498                               | 77.01±9.44                                | 0.6071                               |
| <b>Change from baseline</b>   | -0.29±3.52                  | -0.52±3.59                      | 0.3510                               | -0.51±3.92                     | 0.5714                               | 0.03±5.05                                 | 0.2985                               |
| <b>AF burden &gt; 5%</b>      | 29.9%                       | 17.9%                           | <.0001                               | 27.8%                          | 0.3759                               | 19.3%                                     | <.0001                               |
| <b>Change from baseline</b>   | 4.00%±22.0%                 | 4.00%±17.0%                     | 0.2460                               | 2.00%±18.0%                    | 0.3681                               | 4.00%±18.0%                               | 0.9394                               |
| <b>LV pacing &lt; 95%</b>     | 17.1%                       | 17.8%                           | 0.5753                               | 18.0%                          | 0.6214                               | 19.4%                                     | 0.1626                               |
| <b>Change from baseline</b>   | -1.00%±14.0%                | 0.00%±14.0%                     | 0.8868                               | -1.00%±12.0%                   | 0.0214                               | -2.00%±15.0%                              | 0.1597                               |
| <b>ATP therapy</b>            | 28.4%                       | 28.7%                           | 0.8827                               | 30.4%                          | 0.3832                               | 33.1%                                     | 0.0158                               |
| <b>Shock during follow-up</b> | 12.8%                       | 13.6%                           | 0.4948                               | 13.0%                          | 0.9061                               | 16.5%                                     | 0.0128                               |
| <b>Death</b>                  | 19.7%                       | 18.3%                           | 0.2600                               | 20.9%                          | 0.5393                               | 19.1%                                     | 0.7158                               |

Numbers are % or mean ± standard deviation.

AV: atrioventricular timing; VV: ventricular-to-ventricular timing; ATP: anti-tachycardia pacing; AF: atrial fibrillation; LV: left-ventricular; HRV: heart rate variability; SDANN: standard deviation of the average NN intervals; HR heart rate.
