# Supplementary material
Source: PubMed Central journal article supplement (PMC4795184)
Supplement: NIHMS767379-supplement-5.pdf [file NIHMS767379-supplement-5.pdf]

Figure S1.

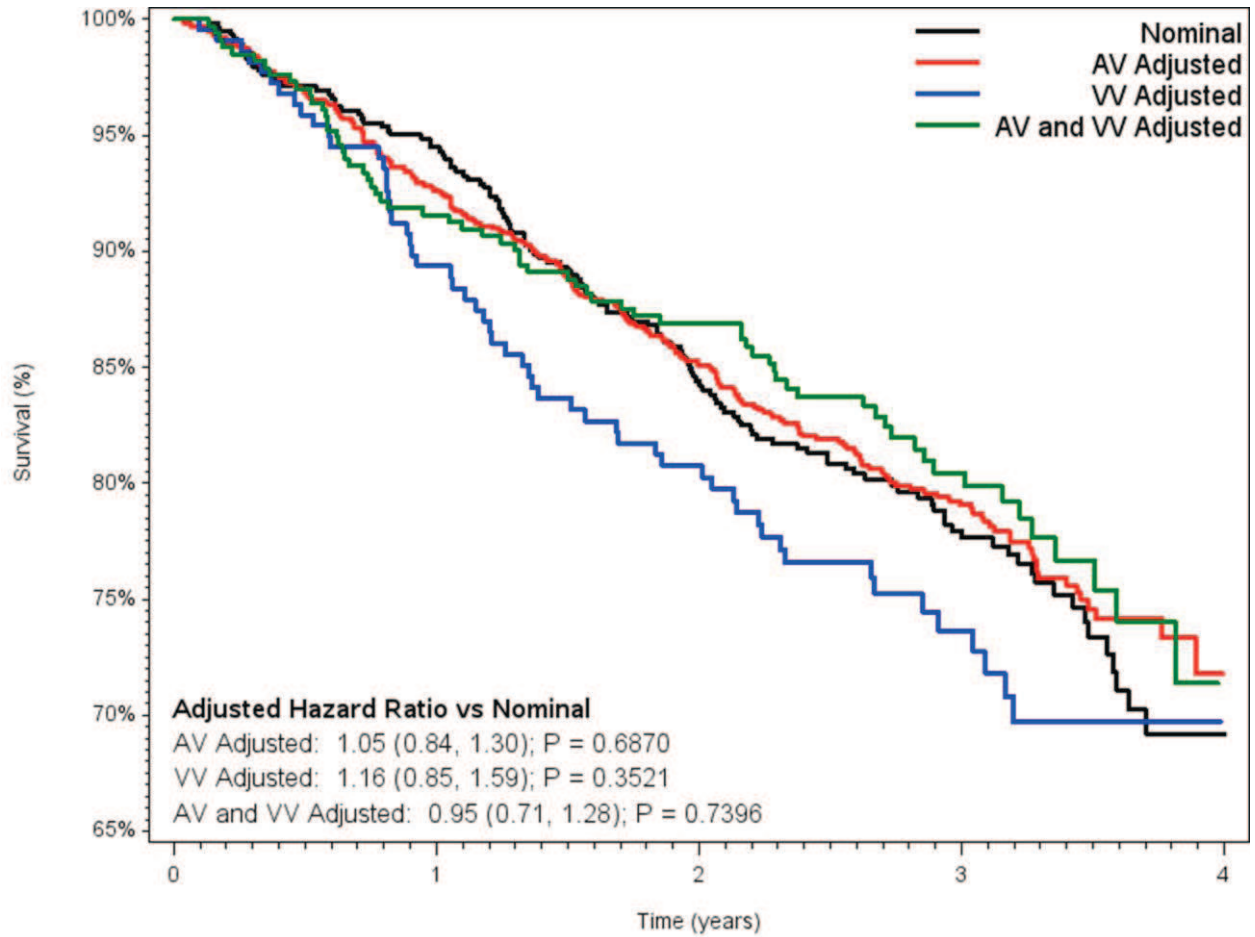

Undjusted Kaplan-Meier curve of survival, in only patients with heart rate variability data available. Hazard ratios adjusted for age, gender, DFT at implant, number of treatment zones, brady programming of DDD, LRL, VF detection rate, AF burden, LV pacing, shock therapy, HRV SDANN, HRV footprint, and HRV mean heart rate.
