# Supplementary material
Source: PubMed Central journal article supplement (PMC4795184)

**Figure S2. Distribution of programming parameters within 10 days of implant, across the entire analysis population.**

*Panel A.*

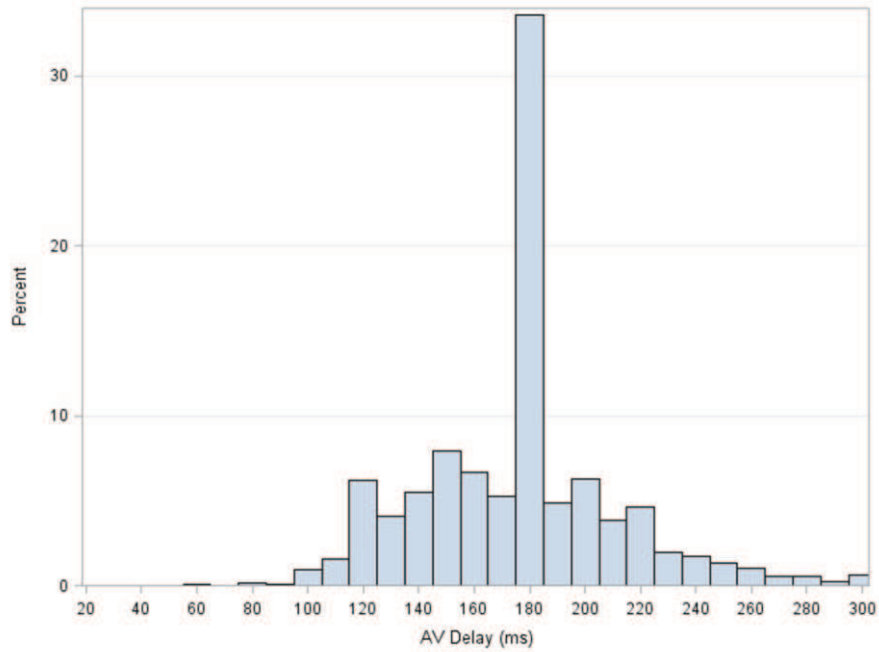

AV: atrioventricular timing (paced); VV: ventricular-to-ventricular timing.

*Panel B.*

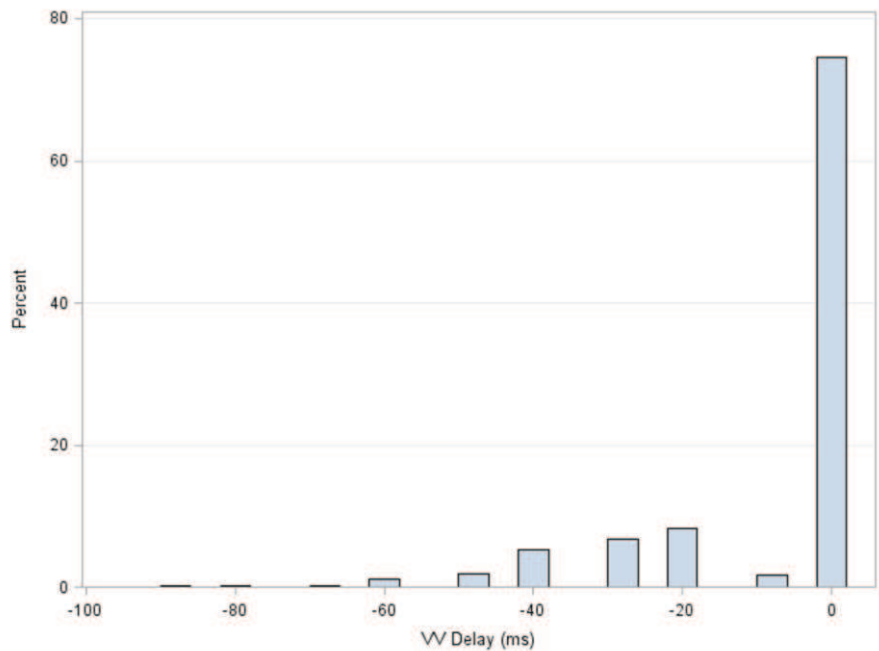

Supplement: NIHMS767379-supplement-6.pdf [file NIHMS767379-supplement-6.pdf]
