# Supplementary material
Source: PubMed Central journal article supplement (PMC4795184)
Supplement: NIHMS767379-supplement-8.pdf [file NIHMS767379-supplement-8.pdf]

**Figure S4. Unadjusted Kaplan-Meier survival curves, dichotomized by baseline paced A-V programming (nominal = 180 ms). Hazard ratios adjusted for age, gender, DFT at implant, number of treatment zones, brady programming of DDD, LRL, VF detection rate, AF burden, LV pacing, and shock therapy.**

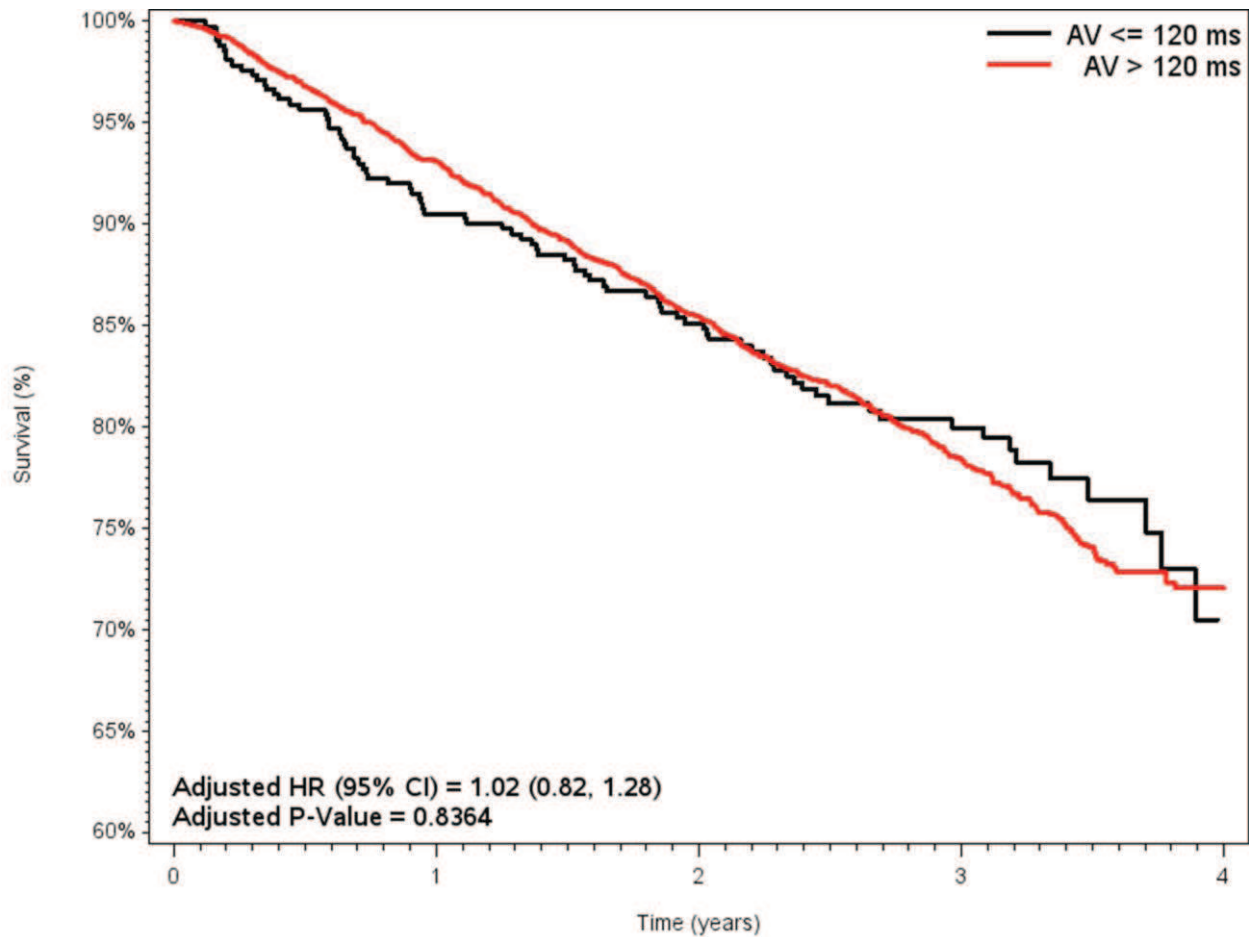

AV: atrioventricular timing; VV: ventricular-to-ventricular timing; DFT: defibrillation threshold; LRL: lower rate limit; VF: ventricular fibrillation; AF: atrial fibrillation; LV: left-ventricular.
